# Supplementary material for: Salt reduction in liquid/semi-solid foods based on the mucopenetration ability of gum arabic
Source: Royal Society of Chemistry journal article supplement (doi:10.1039/c8fo02593b), 2019-01-01
Supplement: c8fo02593b1.pdf [file c8fo02593b1.pdf]

## Electronic supplementary information

### Supplementary Fig. 1S

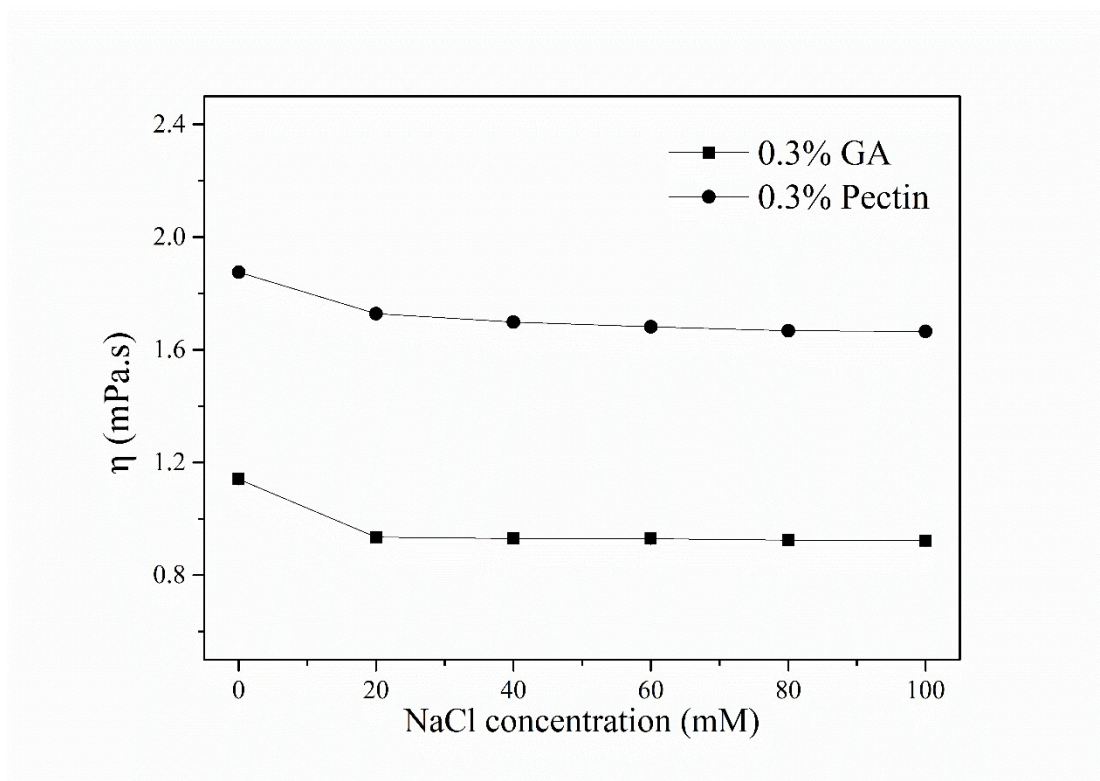

**Supplementary Fig. 1S** Viscosity ( $\eta$ ) as a function of NaCl concentration for GA and pectin solutions(0.3 wt%) at 25°C. The viscometer used was the Ubbelohde type.
